# Supplementary material for: Fatigue, Depression and Health-Related Quality of Life in Patients with Post-Myocardial Infarction during the COVID-19 Pandemic: Results from the Augsburg Myocardial Infarction Registry
Source: MDPI journal article supplement (doi:10.3390/jcm12196349), 2023-10-03
Supplement: s1 [file s1]

# Supplementary material

Table S1: Results of the multivariable linear regression models. Associations between fatigue and depression and HRQoL (MacNew total score, and physical, emotional, and social dimensions) in men

|                            | $\beta$ -estimate (95% CI) | p-value | R <sup>2</sup> |
|----------------------------|----------------------------|---------|----------------|
| <b>Physical dimension</b>  |                            |         |                |
| Fatigue                    | -1.12 (-1.31 - -0.92)      | <0.0001 | 0.3621         |
| Depression                 | -1.72 (-1.98 - -1.46)      | <0.0001 | 0.4102         |
|                            |                            |         |                |
| No depression/no fatigue   | Ref.                       |         | 0.5049         |
| No depression/fatigue      | -0.83 (-1.02 - -0.64)      | <0.0001 |                |
| Depression/no fatigue      | -2.12 (-2.81 - -1.42)      | <0.0001 |                |
| Depression and fatigue     | -2.03 (-2.30 - -1.77)      | <0.0001 |                |
|                            |                            |         |                |
| <b>Emotional dimension</b> |                            |         |                |
| Fatigue                    | -1.15 (-1.33 - -0.96)      | <0.0001 | 0.3371         |
| Depression                 | -1.91 (-2.15 - -1.68)      | <0.0001 | 0.4489         |
|                            |                            |         |                |
| No depression/no fatigue   | Ref.                       |         | 0.5445         |
| No depression/fatigue      | -0.77 (-0.94—0.60)         | <0.0001 |                |
| Depression/no fatigue      | -1.89 (-2.52—1.27)         | <0.0001 |                |
| Depression and fatigue     | -2.25 (-2.48—2.01)         | <0.0001 |                |
|                            |                            |         |                |
| <b>Social dimension</b>    |                            |         |                |
| Fatigue                    | -1.08 (-1.27 - -0.88)      | <0.0001 | 0.3376         |
| Depression                 | -1.77 (-2.02 - -1.52)      | <0.0001 | 0.4224         |
|                            |                            |         |                |
| No depression/no fatigue   | Ref.                       |         | 0.5095         |
| No depression/fatigue      | -0.77 (-0.95 - -0.59)      | <0.0001 |                |
| Depression/no fatigue      | -2.23 (-2.90 - -1.55)      | <0.0001 |                |
| Depression and fatigue     | -2.05 (-2.30 - -1.80)      | <0.0001 |                |
|                            |                            |         |                |
| <b>Total score</b>         |                            |         |                |
| Fatigue                    | -1.08 (-1.26 - -0.90)      | <0.0001 | 0.3597         |
| Depression                 | -1.76 (-1.99 - -1.53)      | <0.0001 | 0.4504         |
|                            |                            |         |                |
| No depression/no fatigue   | Ref.                       |         | 0.5468         |
| No depression/fatigue      | -0.76 (-0.93 - -0.60)      | <0.0001 |                |
| Depression/no fatigue      | -2.04 (-2.65 - -1.43)      | <0.0001 |                |
| Depression and fatigue     | -2.06 (-2.29 - -1.83)      | <0.0001 |                |
|                            |                            |         |                |

Adjusted for age, diabetes, prior stroke, German nationality, highest school education, living alone, smoking status, BMI, any recanalisation therapy, hypertension, STEMI infarction, employment status, prior SARS-CoV-2 infection

Table S2: Results of the multivariable linear regression models. Associations between fatigue and depression and HRQoL (MacNew total score, and physical, emotional, and social dimensions) in women

|                            | $\beta$ -estimate (95% CI) | p-value | R <sup>2</sup> |
|----------------------------|----------------------------|---------|----------------|
| <b>Physical dimension</b>  |                            |         |                |
| Fatigue                    | -1.43 (-1.74 - -1.12)      | <0.0001 | 0.4703         |
| Depression                 | -1.41 (-1.84 - -0.98)      | <0.0001 | 0.3432         |
|                            |                            |         |                |
| No depression/no fatigue   | Ref.                       |         | 0.5246         |
| No depression/fatigue      | -1.16 (-1.49 - -0.84)      | <0.0001 |                |
| Depression/no fatigue*     | -                          | -       |                |
| Depression and fatigue     | -1.96 (-2.36 - -1.56)      | <0.0001 |                |
|                            |                            |         |                |
| <b>Emotional dimension</b> |                            |         |                |
| Fatigue                    | -1.41 (-1.73 - -1.10)      | <0.0001 | 0.4540         |
| Depression                 | -1.84 (-2.23 - -1.45)      | <0.0001 | 0.4788         |
|                            |                            |         |                |
| No depression/no fatigue   | Ref.                       |         | 0.5979         |
| No depression/fatigue      | -0.96 (-1.27 - -0.66)      | <0.0001 |                |
| Depression/no fatigue*     | -                          | -       |                |
| Depression and fatigue     | -2.29 (-2.66 - -1.92)      | <0.0001 |                |
|                            |                            |         |                |
| <b>Social dimension</b>    |                            |         |                |
| Fatigue                    | -1.32 (-1.65 - -0.99)      | <0.0001 | 0.4143         |
| Depression                 | -1.45 (-1.88 - -1.02)      | <0.0001 | 0.3528         |
|                            |                            |         |                |
| No depression/no fatigue   | Ref.                       |         | 0.4846         |
| No depression/fatigue      | -1.00 (-1.35 - -0.66)      | <0.0001 |                |
| Depression/no fatigue*     | -                          | -       |                |
| Depression and fatigue     | -1.92 (-2.34 - -1.50)      | <0.0001 |                |
|                            |                            |         |                |
| <b>Total score</b>         |                            |         |                |
| Fatigue                    | -1.36 (-1.65 - -1.07)      | <0.0001 | 0.4726         |
| Depression                 | -1.56 (-1.94 - -1.18)      | <0.0001 | 0.4183         |
|                            |                            |         |                |
| No depression/no fatigue   | Ref.                       |         | 0.5744         |
| No depression/fatigue      | -1.01 (-1.30 - -0.72)      | <0.0001 |                |
| Depression/no fatigue*     | -                          | -       |                |
| Depression and fatigue     | -2.03 (-2.38 - -1.68)      | <0.0001 |                |
|                            |                            |         |                |

Adjusted for age, diabetes, prior stroke, German nationality, highest school education, living alone, smoking status, BMI, any recanalisation therapy, hypertension, STEMI infarction, employment status, prior SARS-CoV-2 infection

\*There were no women in this group

Table S3: Results of the multivariable linear regression models. Associations between fatigue and depression and HRQoL (MacNew total score, and physical, emotional, and social dimensions) in AMI patients aged <70 years

|                            | $\beta$ -estimate (95% CI) | p-value | R <sup>2</sup> |
|----------------------------|----------------------------|---------|----------------|
| <b>Physical dimension</b>  |                            |         |                |
| Fatigue                    | -1.24 (-1.45 - -1.03)      | <0.0001 | 0.4671         |
| Depression                 | -1.49 (-1.78 - -1.20)      | <0.0001 | 0.4120         |
|                            |                            |         |                |
| No depression/no fatigue   | Ref.                       |         | 0.5370         |
| No depression/fatigue      | -0.92 (-1.14 - -0.69)      | <0.0001 |                |
| Depression/no fatigue      | -0.91 (-2.48 - 0.66)       | 0.2538  |                |
| Depression and fatigue     | -1.83 (-2.10 - -1.56)      | <0.0001 |                |
|                            |                            |         |                |
| <b>Emotional dimension</b> |                            |         |                |
| Fatigue                    | -1.37 (-1.59 - -1.15)      | <0.0001 | 0.4462         |
| Depression                 | -1.95 (-2.24 - -1.67)      | <0.0001 | 0.4944         |
|                            |                            |         |                |
| No depression/no fatigue   | Ref.                       |         | 0.5966         |
| No depression/fatigue      | -0.85 (-1.07 - -0.63)      | <0.0001 |                |
| Depression/no fatigue      | -0.73 (-2.27 - 0.81)       | 0.3510  |                |
| Depression and fatigue     | -2.28 (-2.55 - -2.01)      | <0.0001 |                |
|                            |                            |         |                |
| <b>Social dimension</b>    |                            |         |                |
| Fatigue                    | -1.22 (-1.44 - -1.01)      | <0.0001 | 0.4366         |
| Depression                 | -1.55 (-1.84 - -1.26)      | <0.0001 | 0.4098         |
|                            |                            |         |                |
| No depression/no fatigue   | Ref.                       |         | 0.5209         |
| No depression/fatigue      | -0.86 (-1.09 - -0.64)      | <0.0001 |                |
| Depression/no fatigue      | -1.00 (-2.59 - 0.60)       | 0.2199  |                |
| Depression and fatigue     | -1.87 (-2.15 - -1.59)      | <0.0001 |                |
|                            |                            |         |                |
| <b>Total score</b>         |                            |         |                |
| Fatigue                    | -1.25 (-1.45 - -1.05)      | <0.0001 | 0.4725         |
| Depression                 | -1.67 (-1.93 - -1.40)      | <0.0001 | 0.4715         |
|                            |                            |         |                |
| No depression/no fatigue   | Ref.                       |         | 0.5870         |
| No depression/fatigue      | -0.85 (-1.05 - -0.64)      | <0.0001 |                |
| Depression/no fatigue      | -0.94 (-2.37 - 0.49)       | 0.1963  |                |
| Depression and fatigue     | -1.98 (-2.23 - -1.73)      | <0.0001 |                |
|                            |                            |         |                |

Adjusted for age, diabetes, prior stroke, German nationality, highest school education, living alone, smoking status, BMI, any recanalisation therapy, hypertension, STEMI infarction, employment status, prior SARS-CoV-2 infection

Table S4: Results of the multivariable linear regression models. Associations between fatigue and depression and HRQoL (MacNew total score, and physical, emotional, and social dimensions) in AMI patients aged  $\geq 70$  years

|                            | $\beta$ -estimate (95% CI) | p-value | R <sup>2</sup> |
|----------------------------|----------------------------|---------|----------------|
| <b>Physical dimension</b>  |                            |         |                |
| Fatigue                    | -1.06 (-1.32 - -0.81)      | <0.0001 | 0.3383         |
| Depression                 | -1.70 (-2.02 - -1.37)      | <0.0001 | 0.4089         |
|                            |                            |         |                |
| No depression/no fatigue   | Ref.                       |         | 0.4984         |
| No depression/fatigue      | -0.84 (-1.09 - -0.60)      | <0.0001 |                |
| Depression/no fatigue      | -2.42 (-3.24 - -1.60)      | <0.0001 |                |
| Depression and fatigue     | -2.07 (-2.41 - -1.73)      | <0.0001 |                |
|                            |                            |         |                |
| <b>Emotional dimension</b> |                            |         |                |
| Fatigue                    | -1.02 (-1.26 - -0.79)      | <0.0001 | 0.3211         |
| Depression                 | -1.83 (-2.11 - -1.55)      | <0.0001 | 0.4686         |
|                            |                            |         |                |
| No depression/no fatigue   | Ref.                       |         | 0.5487         |
| No depression/fatigue      | -0.73 (-0.94 - -0.52)      | <0.0001 |                |
| Depression/no fatigue      | -2.12 (-2.82 - -1.42)      | <0.0001 |                |
| Depression and fatigue     | -2.20 (-2.49 - -1.91)      | <0.0001 |                |
|                            |                            |         |                |
| <b>Social dimension</b>    |                            |         |                |
| Fatigue                    | -0.97 (-1.23 - -0.72)      | <0.0001 | 0.3085         |
| Depression                 | -1.72 (-2.04 - -1.41)      | <0.0001 | 0.4202         |
|                            |                            |         |                |
| No depression/no fatigue   | Ref.                       |         | 0.4949         |
| No depression/fatigue      | -0.74 (-0.98 - -0.50)      | <0.0001 |                |
| Depression/no fatigue      | -2.48 (-3.28 - -1.69)      | <0.0001 |                |
| Depression and fatigue     | -2.03 (-2.36 - -1.70)      | <0.0001 |                |
|                            |                            |         |                |
| <b>Total score</b>         |                            |         |                |
| Fatigue                    | -0.99 (-1.21 - -0.76)      | <0.0001 | 0.3365         |
| Depression                 | -1.70 (-1.98 - -1.42)      | <0.0001 | 0.4252         |
|                            |                            |         |                |
| No depression/no fatigue   | Ref.                       |         | 0.5438         |
| No depression/fatigue      | -0.74 (-0.95 - -0.54)      | <0.0001 |                |
| Depression/no fatigue      | -2.28 (-2.98 - -1.59)      | <0.0001 |                |
| Depression and fatigue     | -2.04 (-2.32 - -1.75)      | <0.0001 |                |
|                            |                            |         |                |

Adjusted for age, diabetes, prior stroke, German nationality, highest school education, living alone, smoking status, BMI, any recanalisation therapy, hypertension, STEMI infarction, employment status, prior SARS-CoV-2 infection
